# Supplementary figures and images for: TP53 DNA Binding Domain Mutations Predict Progression-Free Survival of Bevacizumab Therapy in Metastatic Colorectal Cancer
Source: MDPI journal article supplement (doi:10.3390/cancers11081079), 2019-07-30

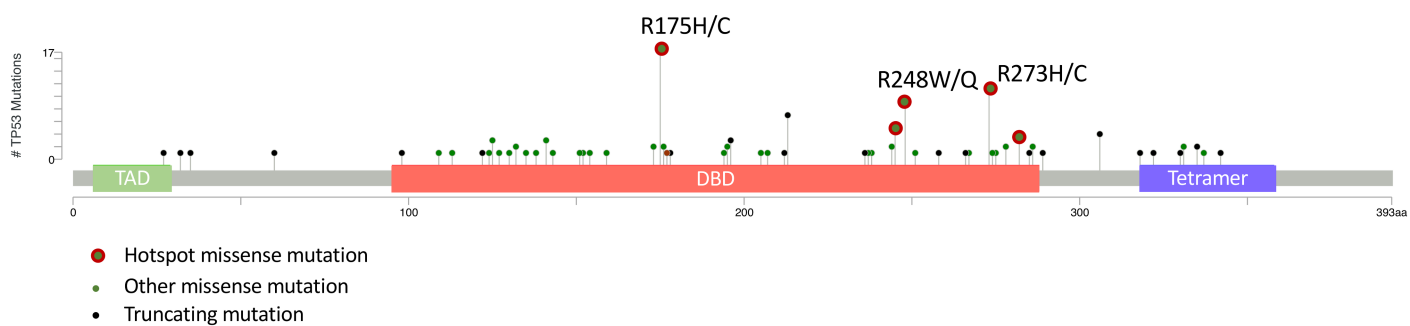

Supplement: s1 [file s1]

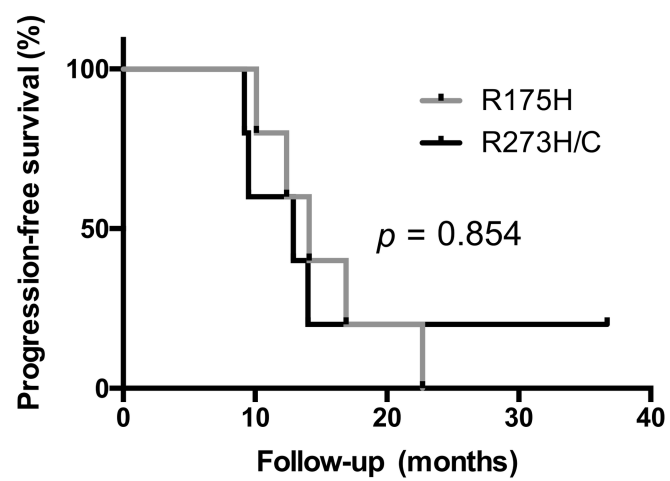

Supplement: s1 [file s1]
